# Supplementary material for: Fingerprinting of neurotoxic compounds using a mouse embryonic stem cell dual luminescence reporter assay
Source: PubMed Central journal article supplement (PMC5225183; doi:10.1007/s00204-016-1690-2), 2016-03-25
Supplement: 204_2016_1690_MOESM1_ESM.pdf [file 204_2016_1690_MOESM1_ESM.pdf]

# Supplemental Material

## Fingerprinting of neurotoxic compounds using a mouse embryonic stem cell dual luminescence reporter assay

M. Colaianna, S. Ilmjärv, H. Peterson, I. Kern, S. Julien, M. Baquié, G. Pallocca, S. Bosgra, A. Sachinidis, J.G. Hengstler, M. Leist, KH Krause

### Table of contents

- **Supplemental Material, Table S1**

Classification of compounds in three classes based on clinical evidence for neurotoxicity

- **Supplemental Material, Figure S1**

Type of response curves as a function of compound category.

- **Supplemental Material, Figure S2**

*In vitro* - *in vivo* comparison of toxicity data by PBPK modeling

Values for lipid fraction (VFL), albumin concentration (P) and total protein concentration (P)\* in rat and human plasma and in N2 (x) and BHK (y) medium. Values for plasma bound fraction (fb,pl); octanol:water partition coefficient (Kow) and molecular weight (MW).

- **Supplemental Material, Figures S3 and S4**

Effect of well-known non-toxic compounds (negative controls) on neuronal (FLuc), general (RLuc) promoter activities and on DNA content (PI assay).

- **Supplemental Material, Figures from S5 to S12**

Effect of other compounds of ESNATS collection on neuronal (FLuc), general (RLuc) promoter activities and on DNA content (PI assay).

- **Supplemental Material, Figure S13**

PBPK modelling of hit compounds

Graphical representation of the relevant concentrations of hit compounds.

- **Supplemental Material, Figure S14**

A scatterplot of log<sub>10</sub> transformed LOEL and a principal component analysis (PCA) of compounds.

- **Supplemental Figure Legends**

- **Supplemental Bibliography**

**Table S1**

Classification of compounds in three classes based on clinical evidence for neurotoxicity

| <b>Non-neurotoxic<br/>(no evidence for<br/>DNT/NT)</b> | <b>Possibly (developmental)<br/>neurotoxic</b> | <b>Well-established (developmental)<br/>neurotoxic</b> |
|--------------------------------------------------------|------------------------------------------------|--------------------------------------------------------|
| Saccharin                                              | Panobinostat*                                  | Valproic acid <sup>e</sup>                             |
| Ibuprofen                                              | Entinostat*                                    | Methylmercury <sup>f</sup>                             |
| Omeprazole                                             | Belinostat*                                    | PBDE-99 <sup>g</sup>                                   |
| Nicotinic acid                                         | Methoxyacetic acid*                            | PCB-153 <sup>h</sup>                                   |
| Uric acid                                              | Phenylmercuric acetate**                       | Arsenic trioxide <sup>i</sup>                          |
| D-mannitol                                             | 4-chloromercuric benzoic acid**                | Trimethyltin chloride <sup>l</sup>                     |
| Propranolol                                            | Mercury bromide**                              | Chlorpromazine <sup>m</sup>                            |
| G-CSF                                                  | Thimerosal**                                   |                                                        |
| Erythropoietin                                         | Triadimefon***                                 |                                                        |
| Neuregulin                                             | Cyproconazole***                               |                                                        |
| Oxytocin                                               | Geldanamycin***                                |                                                        |
| Sildenafil                                             | Abiraterone***                                 |                                                        |
| Rivaroxaban                                            | IFN-beta***                                    |                                                        |
|                                                        | Nintedanib <sup>a</sup>                        |                                                        |
|                                                        | Amiodarone <sup>b</sup>                        |                                                        |
|                                                        | Sulfadiazine <sup>c</sup>                      |                                                        |
|                                                        | Imatinib <sup>d</sup>                          |                                                        |
|                                                        | Gefitinib <sup>n</sup>                         |                                                        |

\*Belonging to HDACi family or similar mode of action as valproic acid, a known DNT toxicant (Jentink et al. 2010);

\*\* Organo-mercury compounds, similar mode of action as methylmercury, known DNT/NT toxicant (Grandjean and Landrigan 2006)

\*\*\* Positive hit in other ESNATS test battery test systems (Zimmer et al. 2014)

<sup>a</sup> Patejdl et al. 2013

<sup>b</sup> Orr and Ahlskog 2009

<sup>c</sup> Reboli and Mandler 1992

<sup>d</sup> Rinne et al., 2012

<sup>e</sup> Krug et al. 2013

<sup>f</sup> Grandjean and Herz 2015

<sup>g</sup> Eskenazi et al. 2013

<sup>h</sup> Grandjean and Landrigan 2006

<sup>i</sup> Grandjean and Herz 2015

<sup>l</sup> Kreyberg et al. 1992

<sup>m</sup> Morris et al. 2009

<sup>n</sup> It is inhibiting signal cascades important in development, and it could therefore cause DNT. Most tyrosine kinase inhibitors are recommended not to be used during pregnancy. Some evidences of *in vivo* fetotoxicity for gefitinib were reported in a European public assessment report by the European Medicines Agency (EMA, 2008) and by Food and Drug Administration (FDA, 2015)

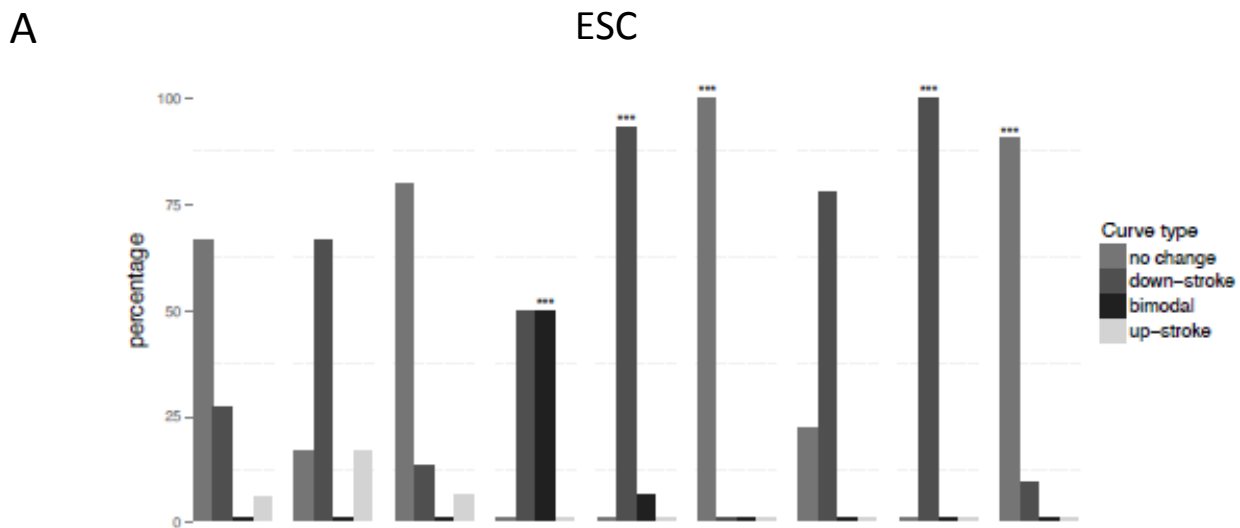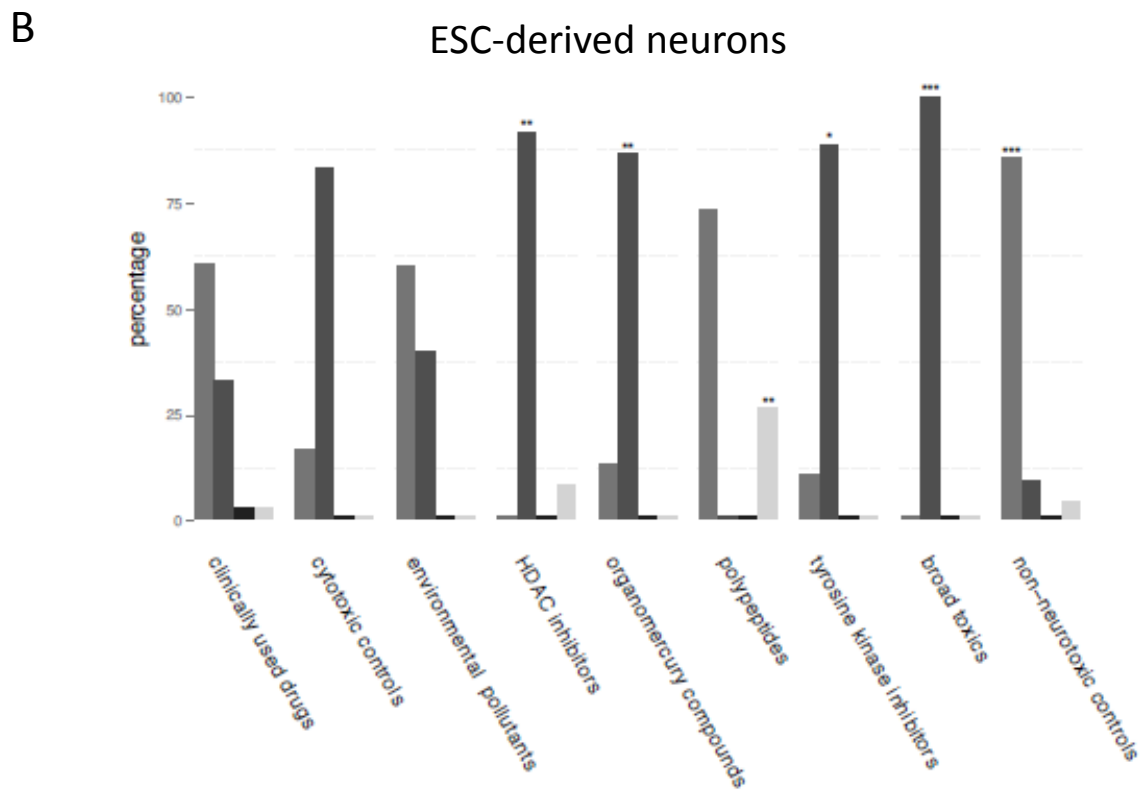

Fig. S1

| A                                           | Rat plasma | Human plasma | N2 medium (x) | BHK medium (y) |
|---------------------------------------------|------------|--------------|---------------|----------------|
| Lipid fraction (VFL) [mg/l]                 | 3600       | 6000         | -             | 160            |
| Albumin concentration (P) [ $\mu$ M]        | 421        | 600          | -             | 36             |
| Total protein concentration (P)* [ $\mu$ M] | 877        | 1000         | 10.9          | 63             |

  

| B                  | Kow    | fb,pl | MW          |
|--------------------|--------|-------|-------------|
| <b>Abiraterone</b> | 131826 | 0.998 | 349.5 g/mol |

  

| Concentrations in [ $\mu$ M]                         | Rat       |           | Human     |           |
|------------------------------------------------------|-----------|-----------|-----------|-----------|
|                                                      | $C_{max}$ | $C_{avg}$ | $C_{max}$ | $C_{avg}$ |
| Total concentration <i>in vivo</i> (ECpl)            | 3.09E-02  | 4.01E-03  | 6.47E-01  | 1.40E-01  |
| Free concentration <i>in vivo</i>                    | 1.30E-07  | 1.68E-08  | 1.63E-06  | 3.53E-07  |
| Equivalent total concentration <i>in vitro</i> (ECx) | 3.83E-04  | 4.97E-05  | 7.04E-03  | 1.52E-03  |
| Equivalent total concentration <i>in vitro</i> (ECy) | 2.22E-03  | 2.88E-04  | 4.07E-02  | 8.80E-03  |

  

| C                   | Kow | fb,pl | MW          |
|---------------------|-----|-------|-------------|
| <b>Geldanamycin</b> | 417 | 0.990 | 560.7 g/mol |

  

| Concentrations in [ $\mu$ M]                         | Rat       |
|------------------------------------------------------|-----------|
|                                                      | $C_{max}$ |
| Total concentration <i>in vivo</i> (ECpl)            | 2.23E-00  |
| Free concentration <i>in vivo</i>                    | 8.91E-03  |
| Equivalent total concentration <i>in vitro</i> (ECx) | 8.91E-03  |
| Equivalent total concentration <i>in vitro</i> (ECy) | 1.98E-01  |

  

| D                    | Kow | fb,pl | MW          |
|----------------------|-----|-------|-------------|
| <b>Teriflunomide</b> | 327 | 0.995 | 270.2 g/mol |

  

| Concentrations in [ $\mu$ M]                         | Rat       |           | Human     |
|------------------------------------------------------|-----------|-----------|-----------|
|                                                      | $C_{max}$ | $C_{avg}$ | $C_{avg}$ |
| Total concentration <i>in vivo</i> (ECpl)            | 1.11E+01  | 5.09E+00  | 1.65E+02  |
| Free concentration <i>in vivo</i>                    | 2.56E-02  | 1.17E-02  | 2.80E-01  |
| Equivalent total concentration <i>in vitro</i> (ECx) | 2.56E-02  | 1.17E-02  | 2.80E-01  |
| Equivalent total concentration <i>in vitro</i> (ECy) | 9.72E-01  | 4.45E-01  | 1.01E-01  |

Fig. S2

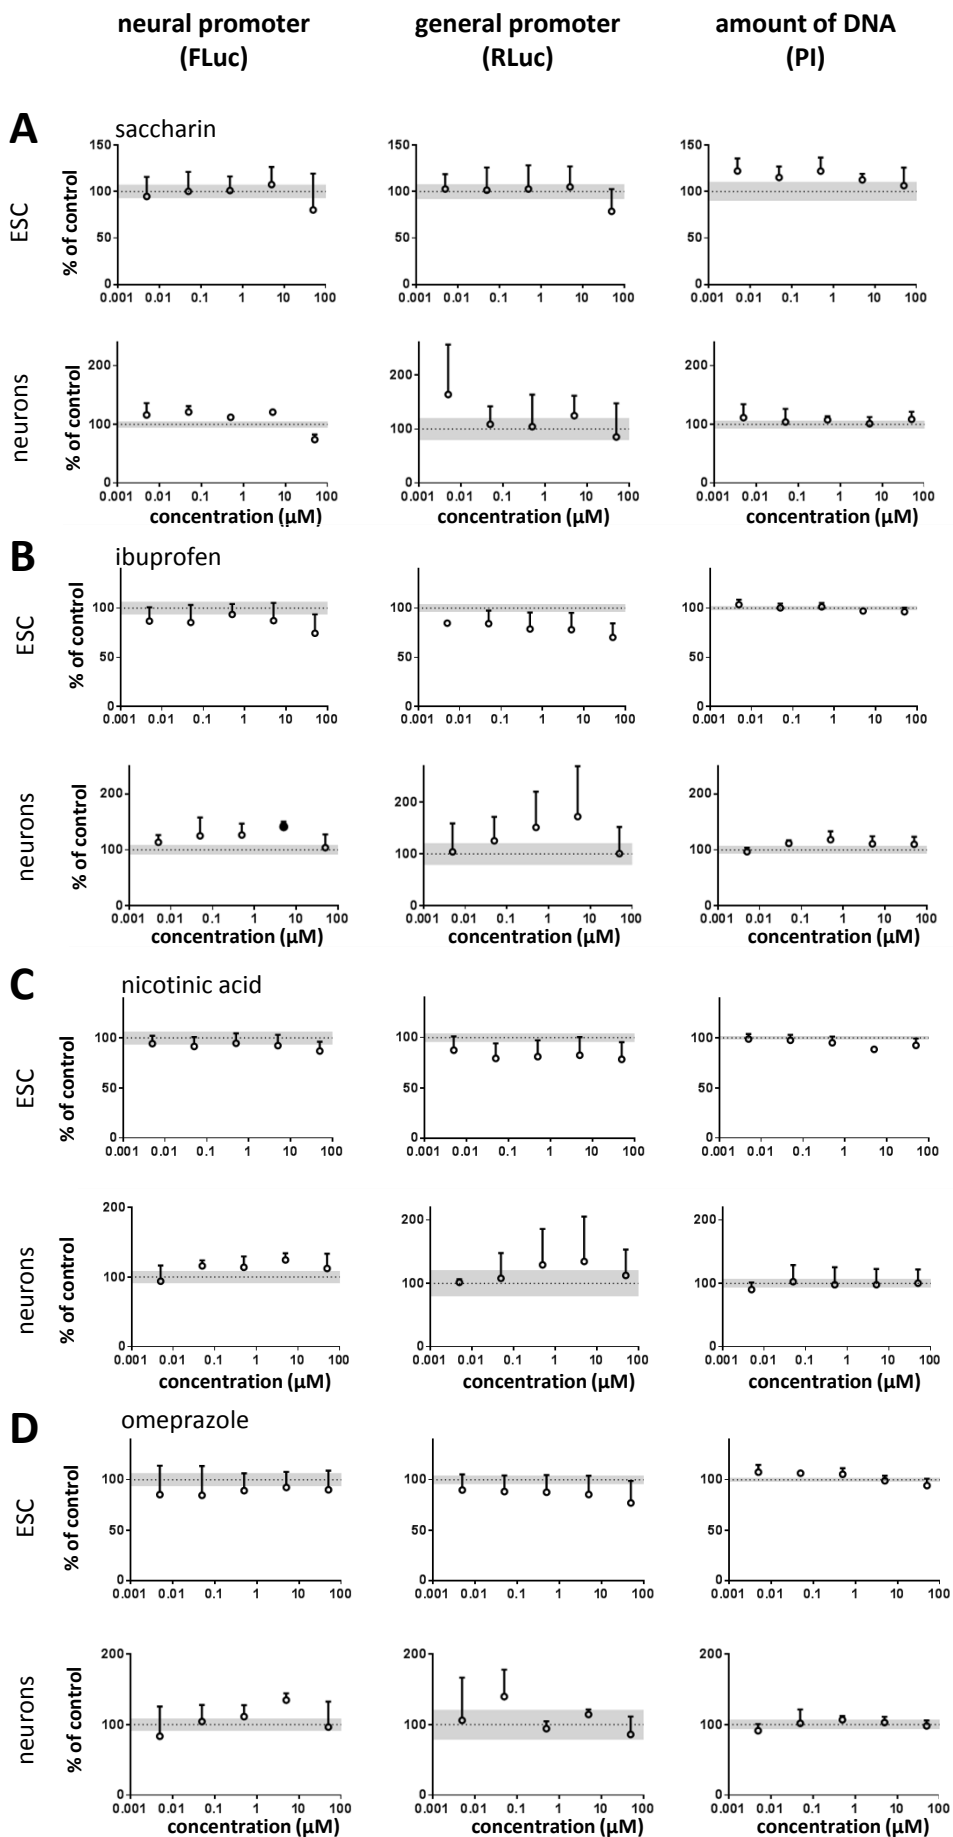

Fig. S3

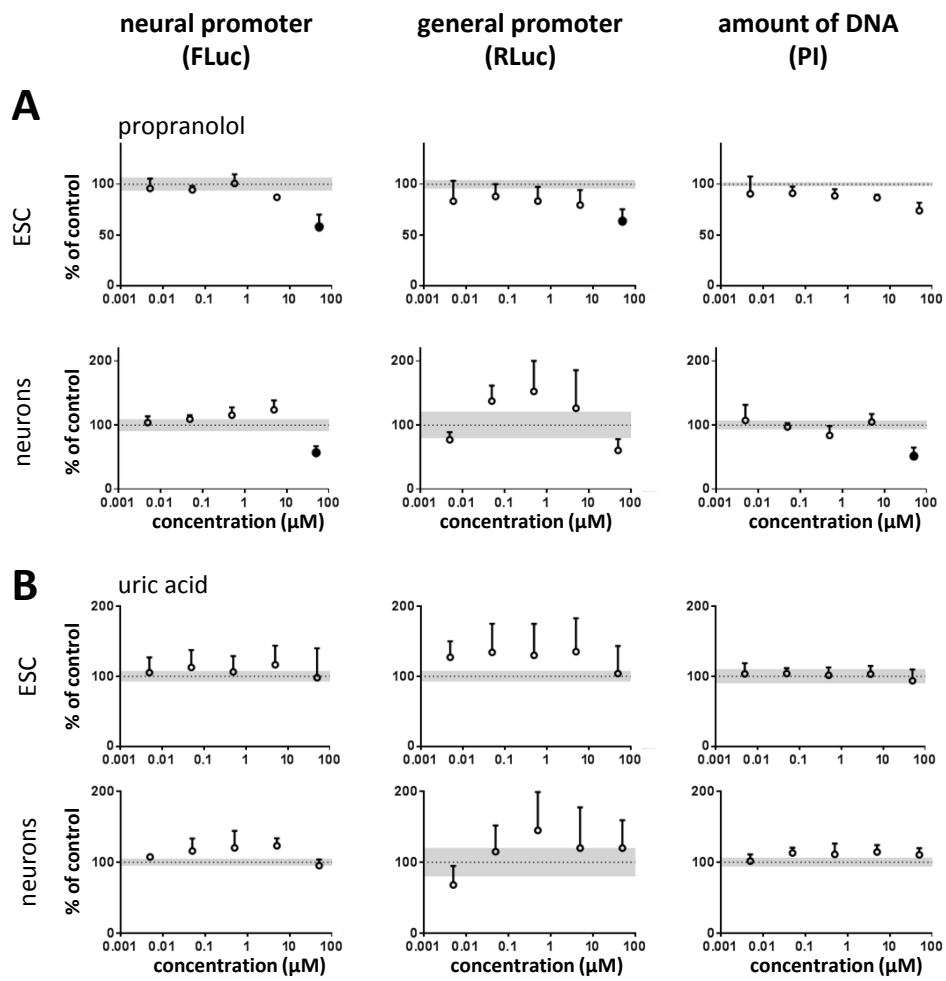

Fig. S4

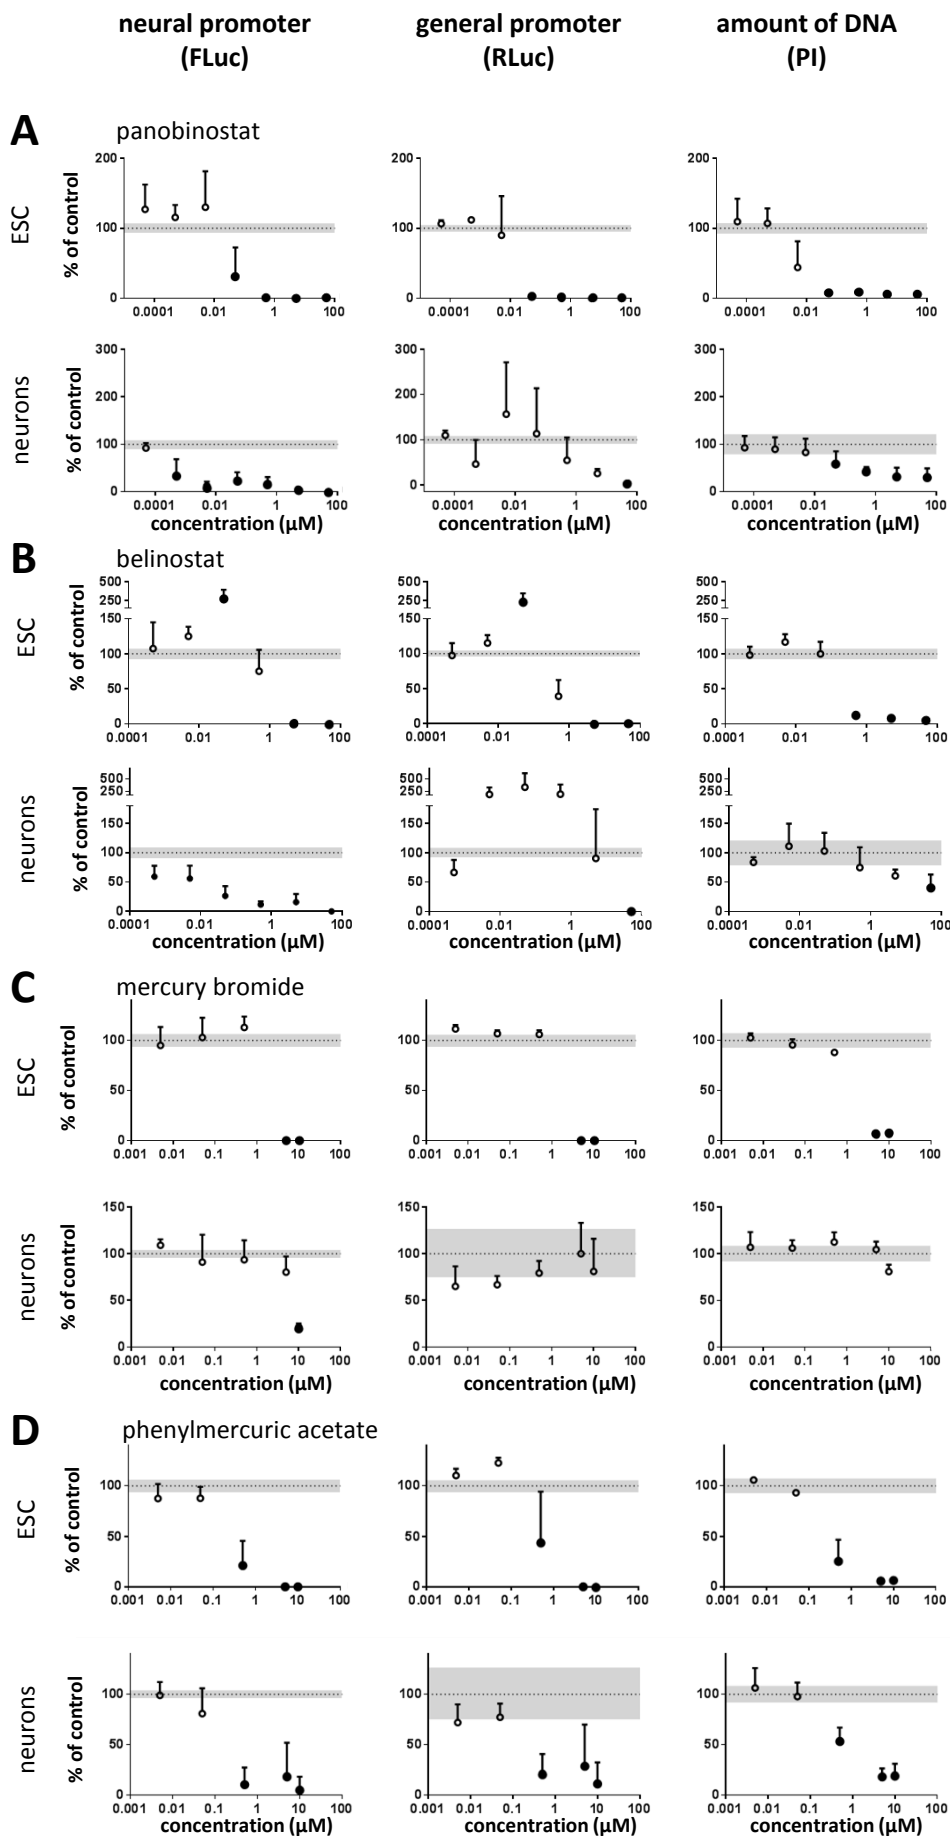

Fig. S5

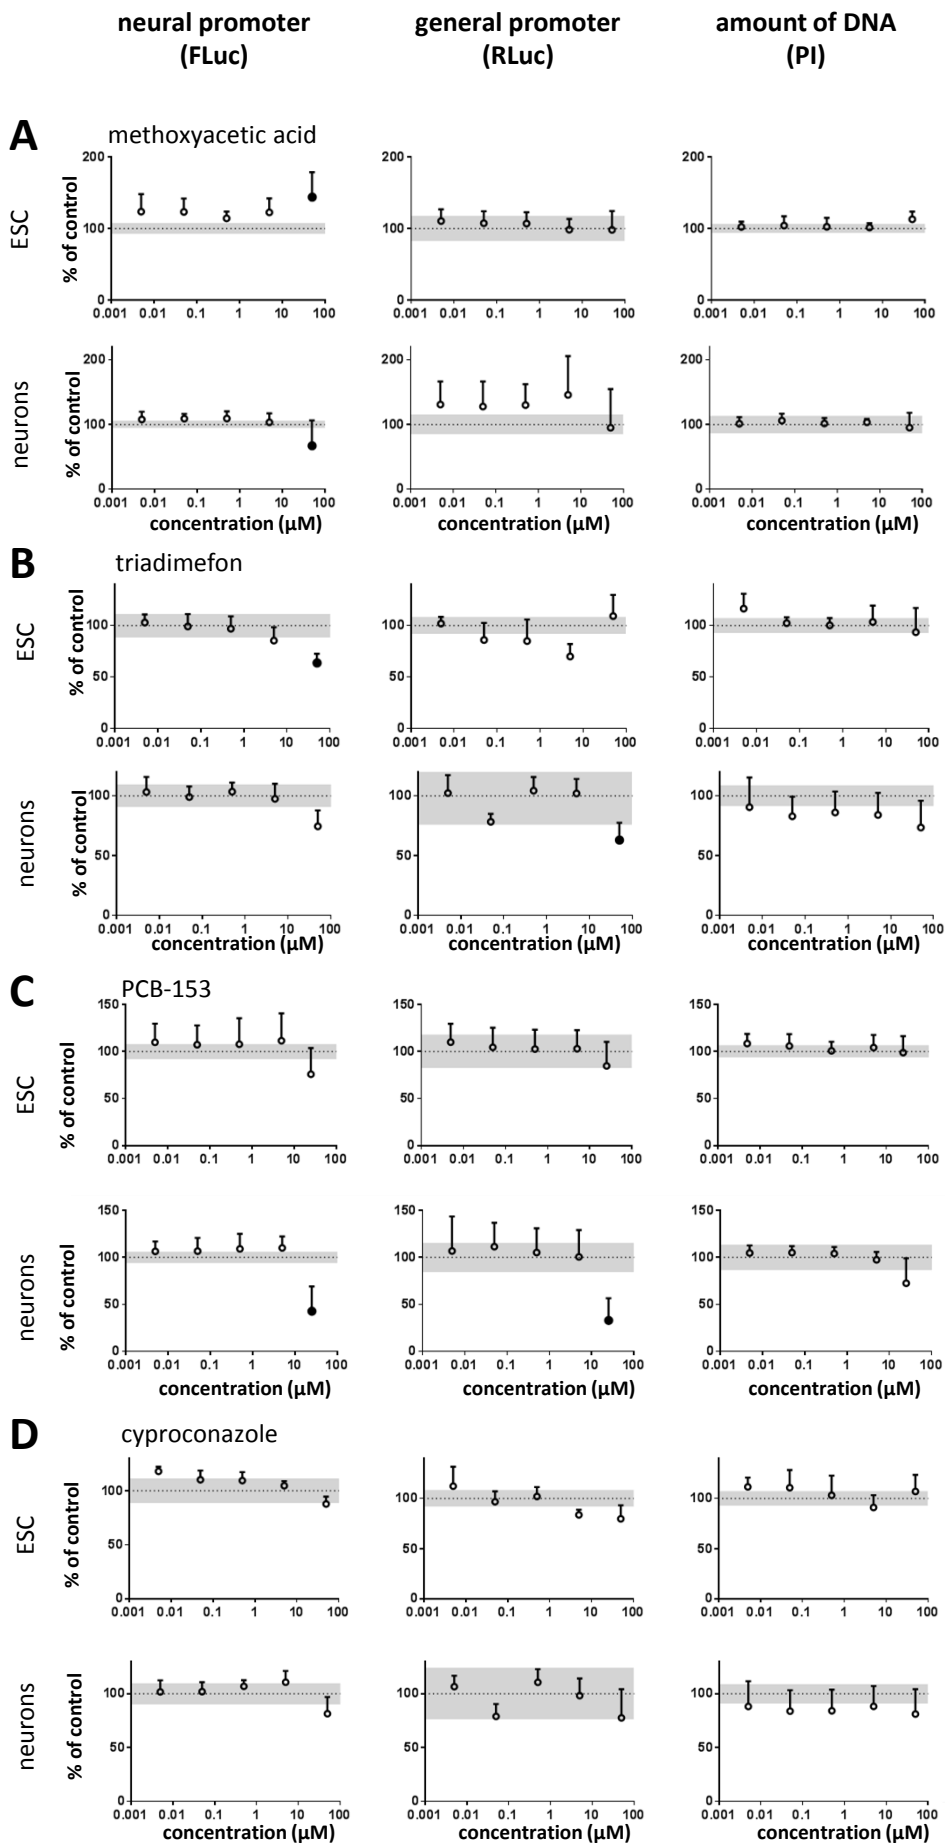

Fig. S6



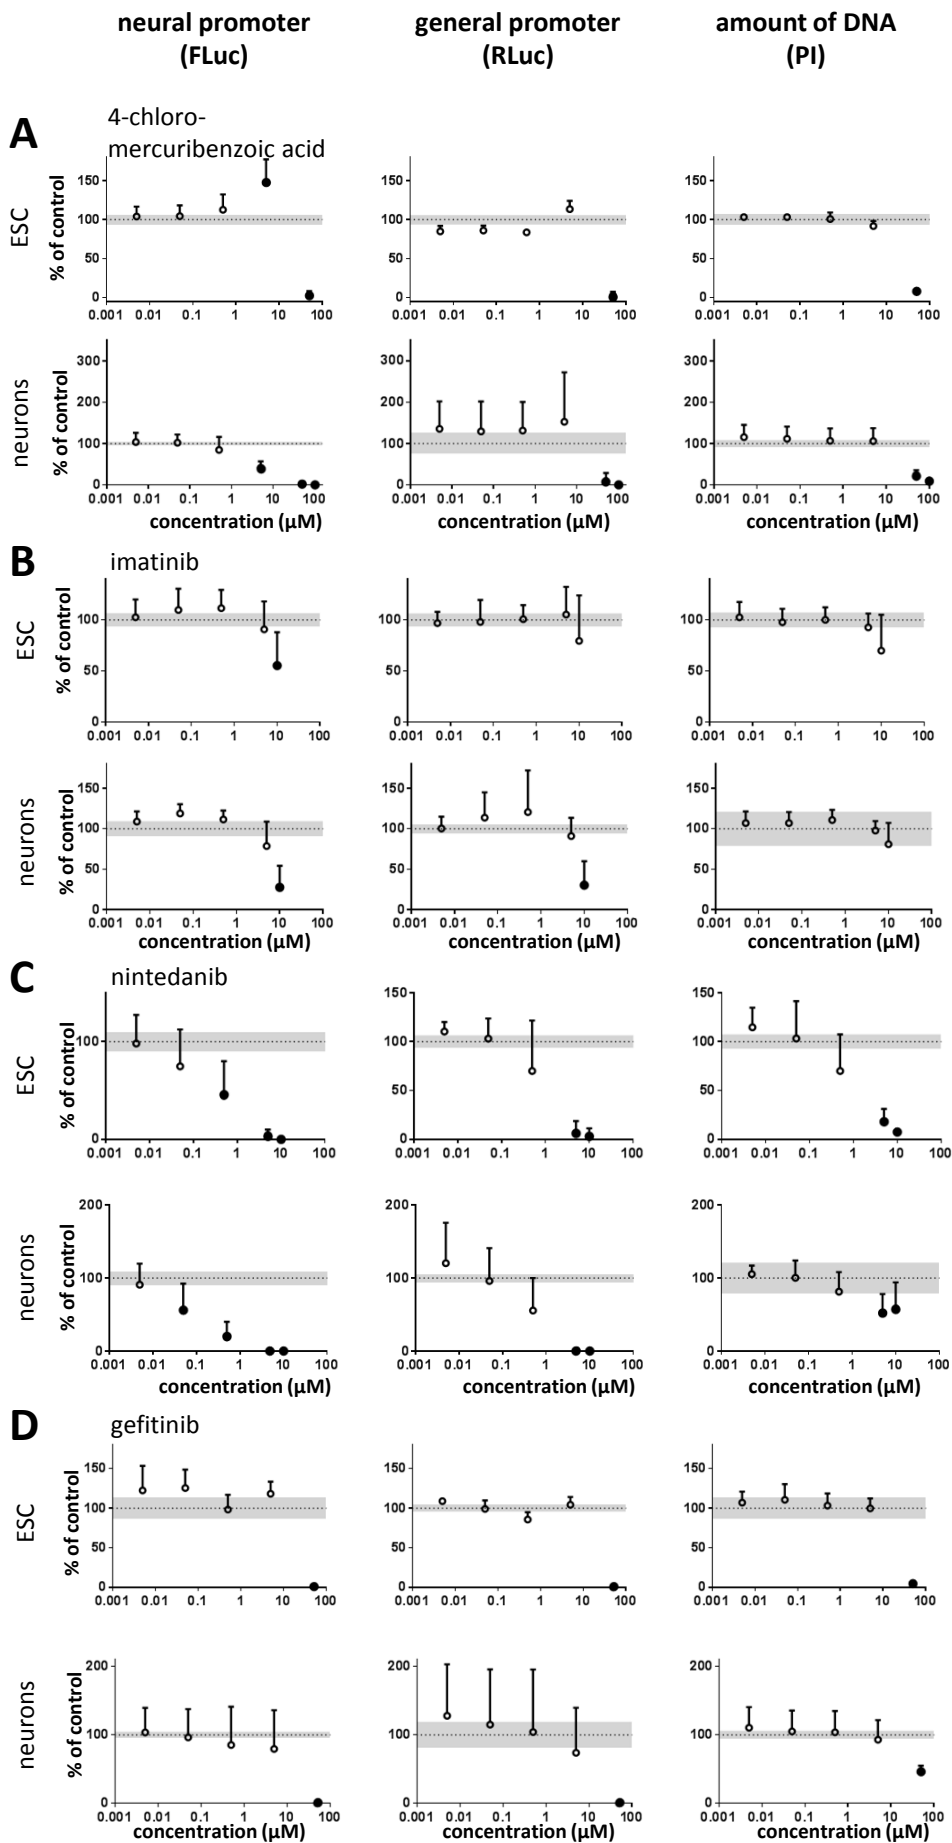

Fig. S7

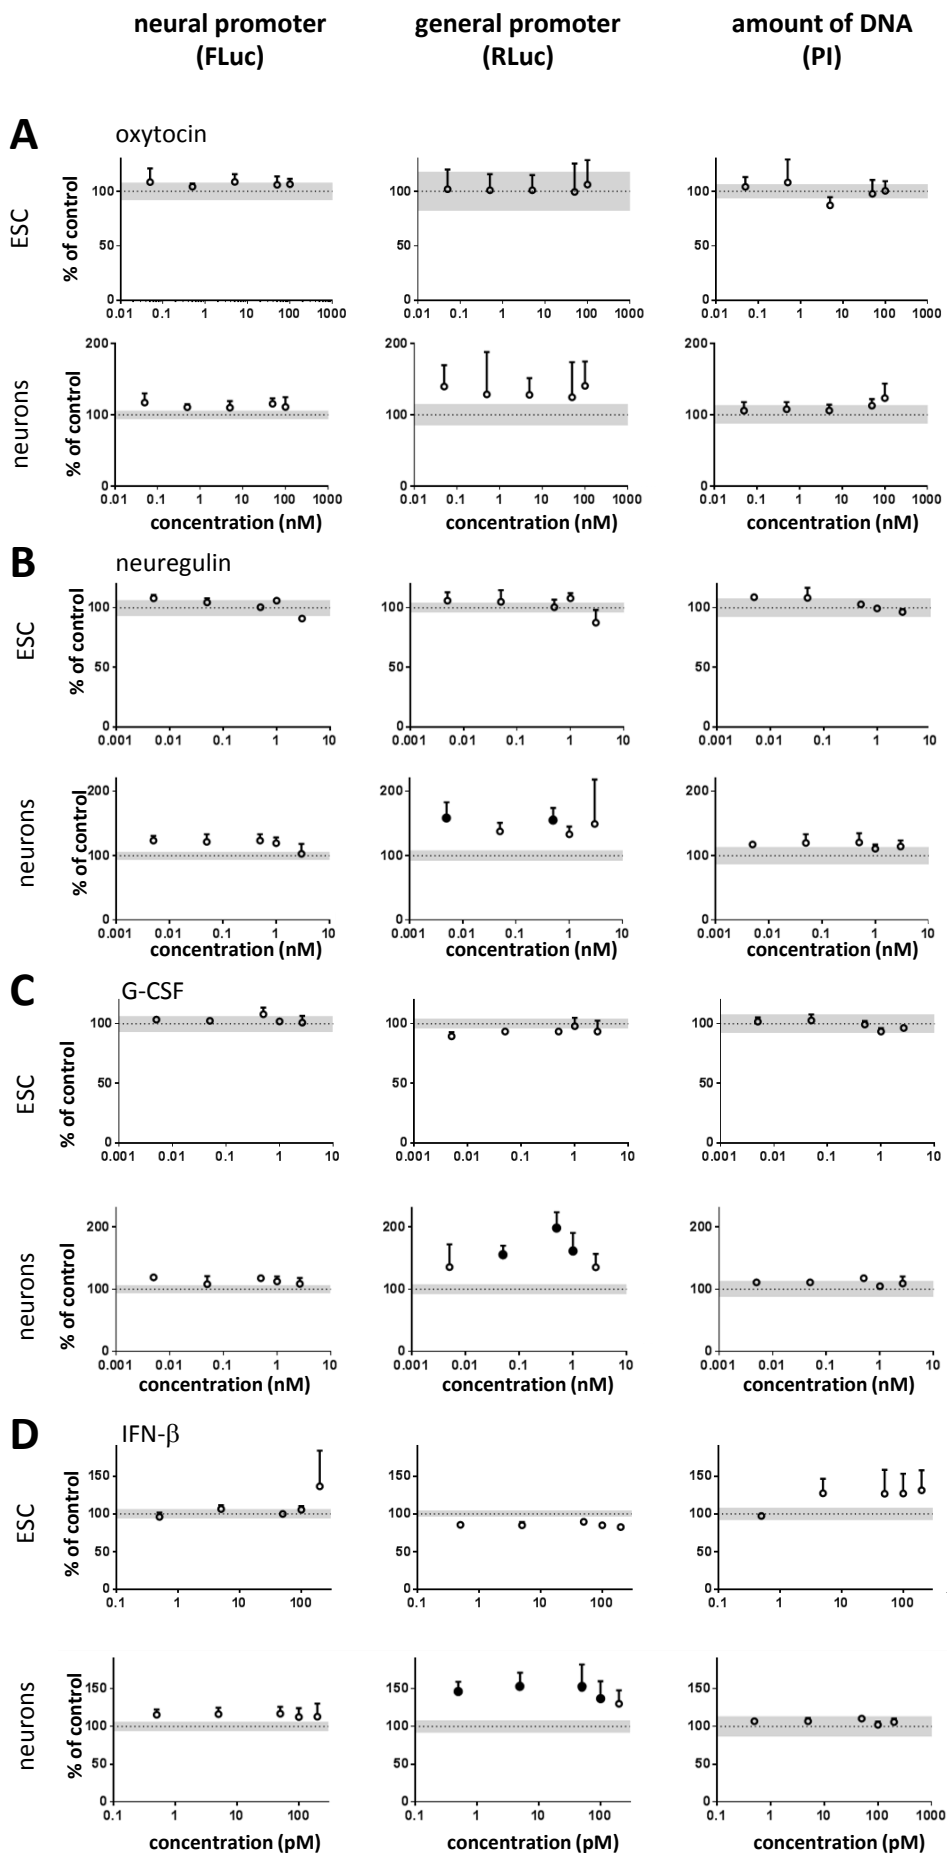

**Fig. S8**

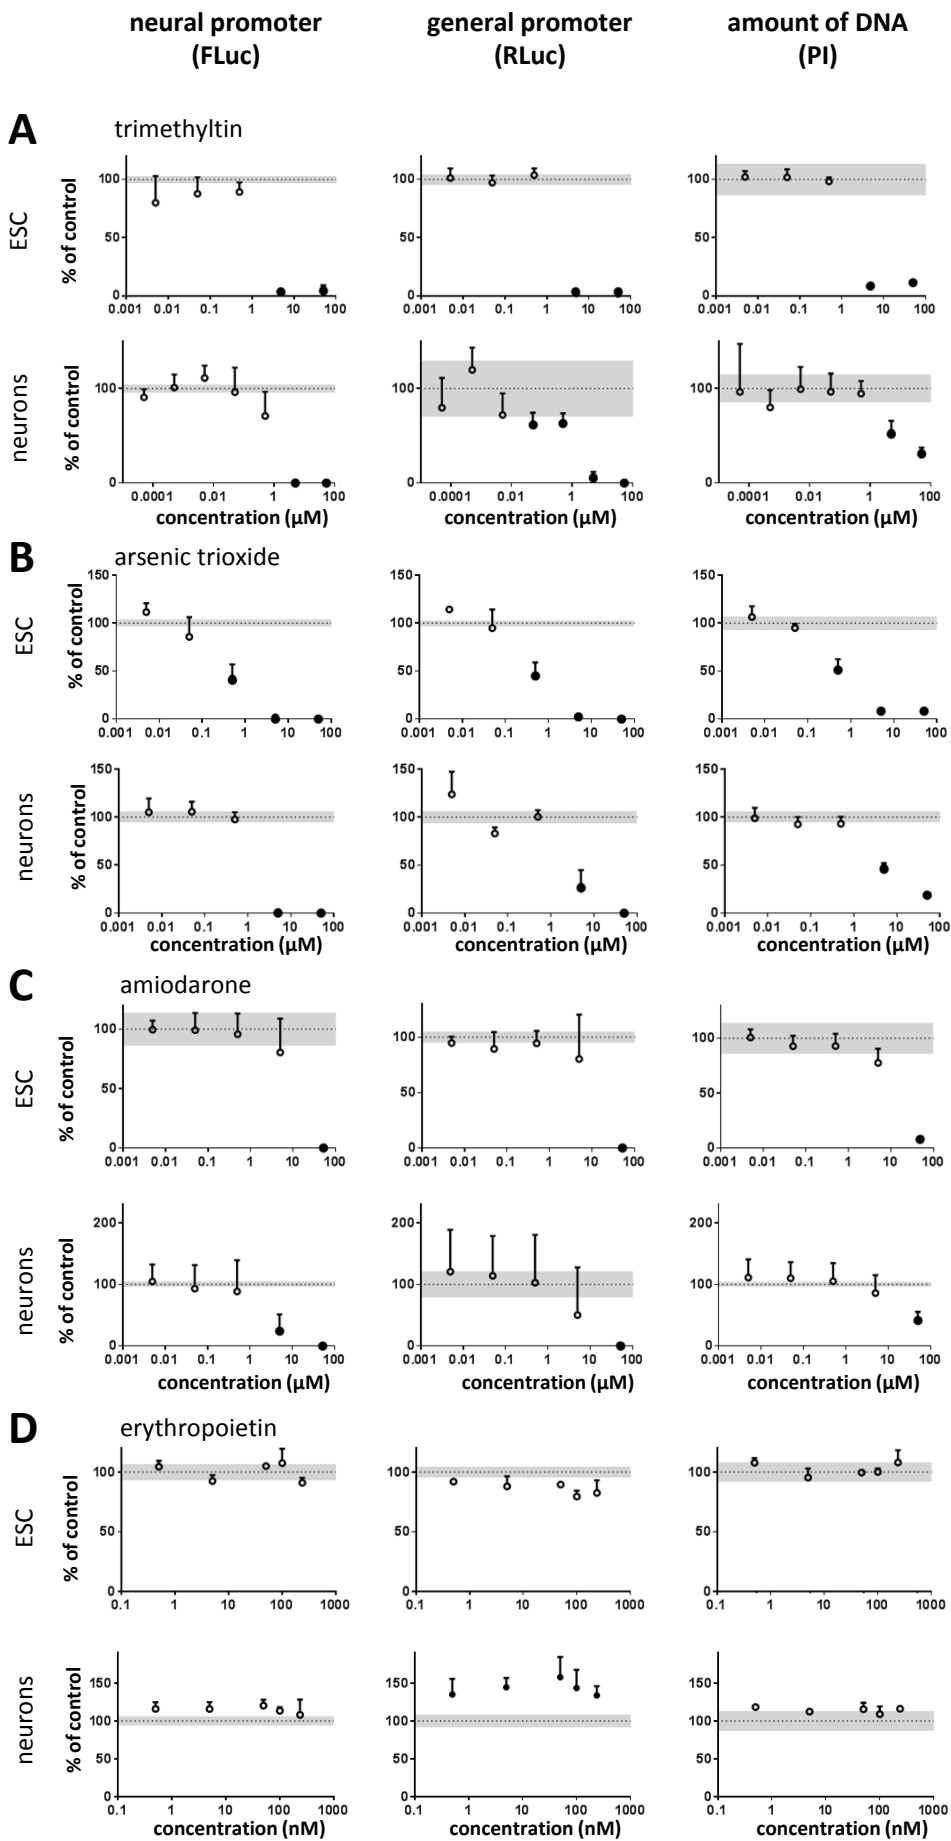

**Fig. S9**

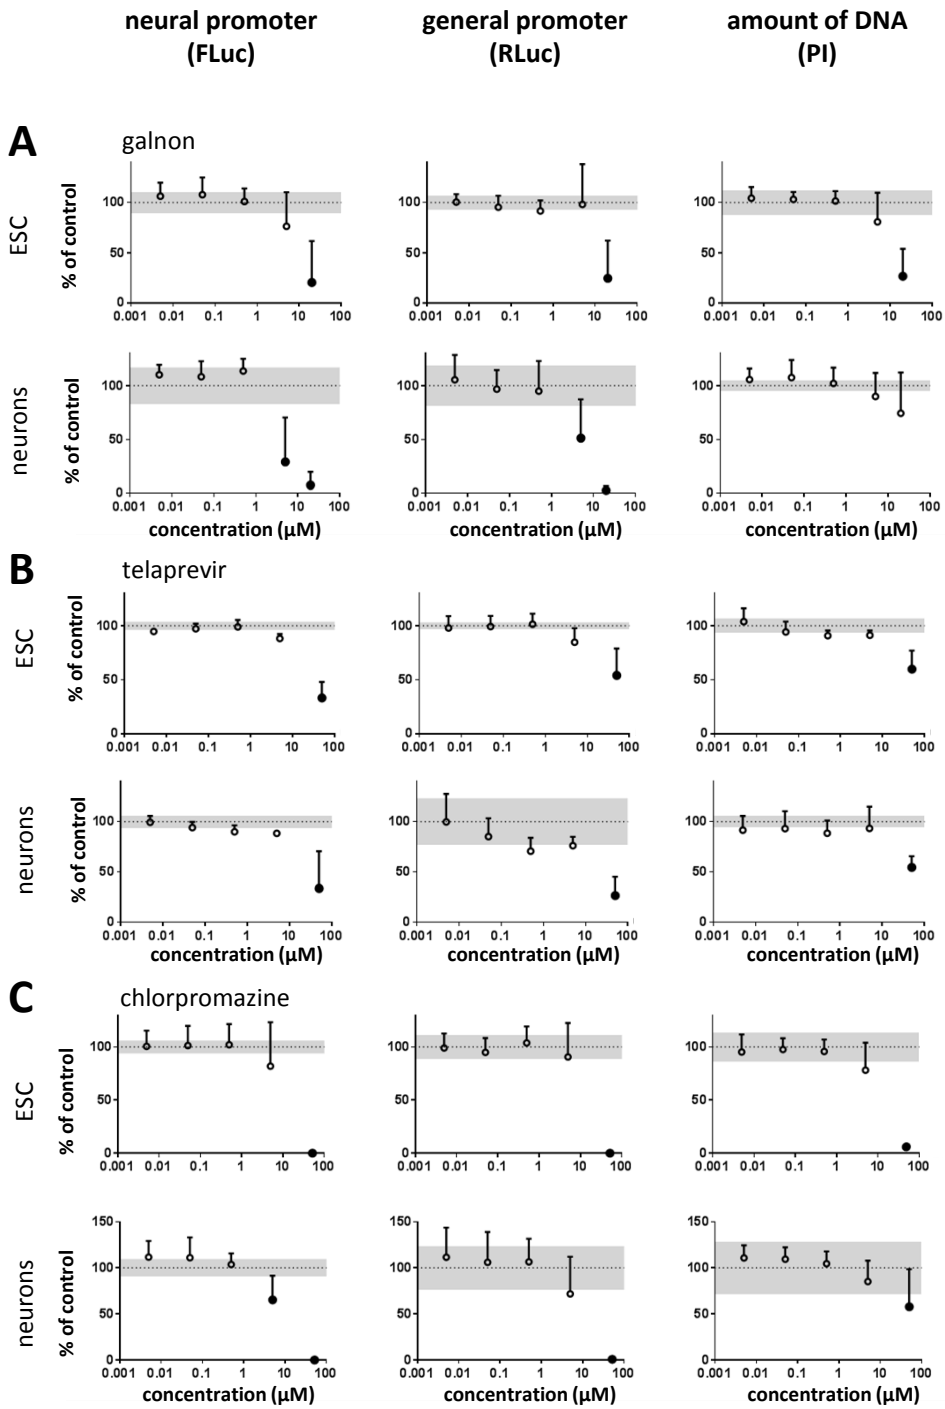

Fig. S10

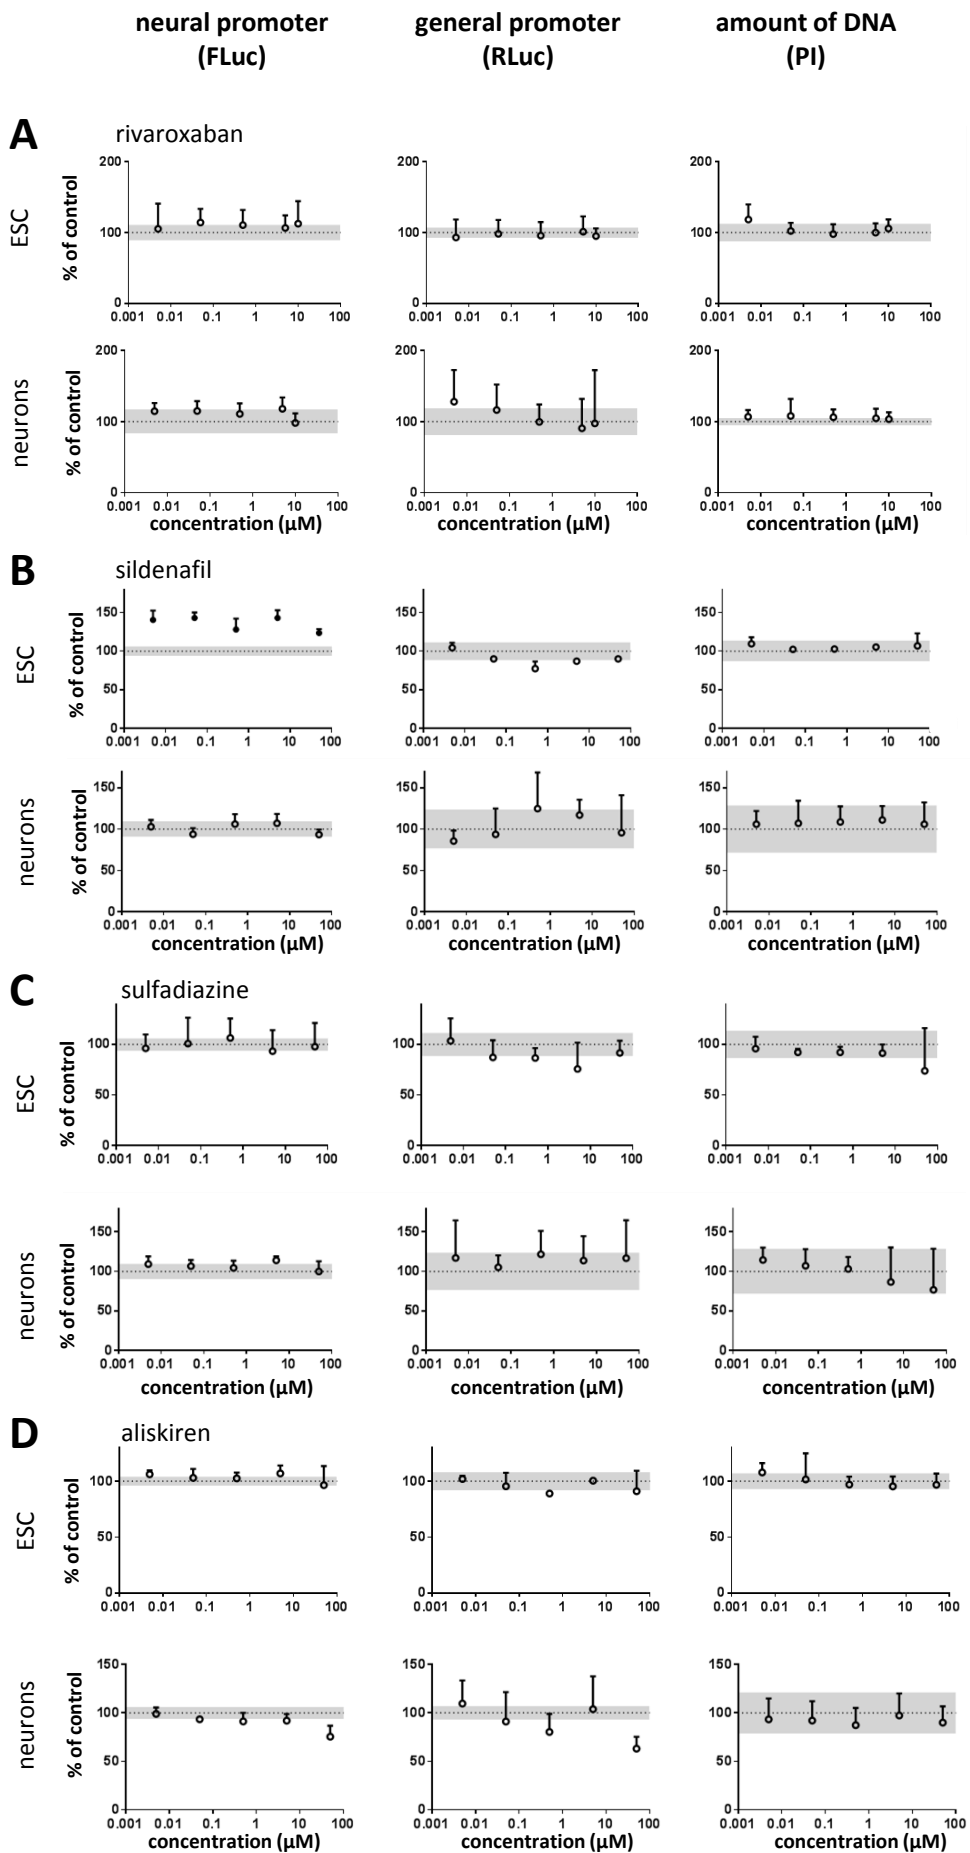

**Fig. S11**

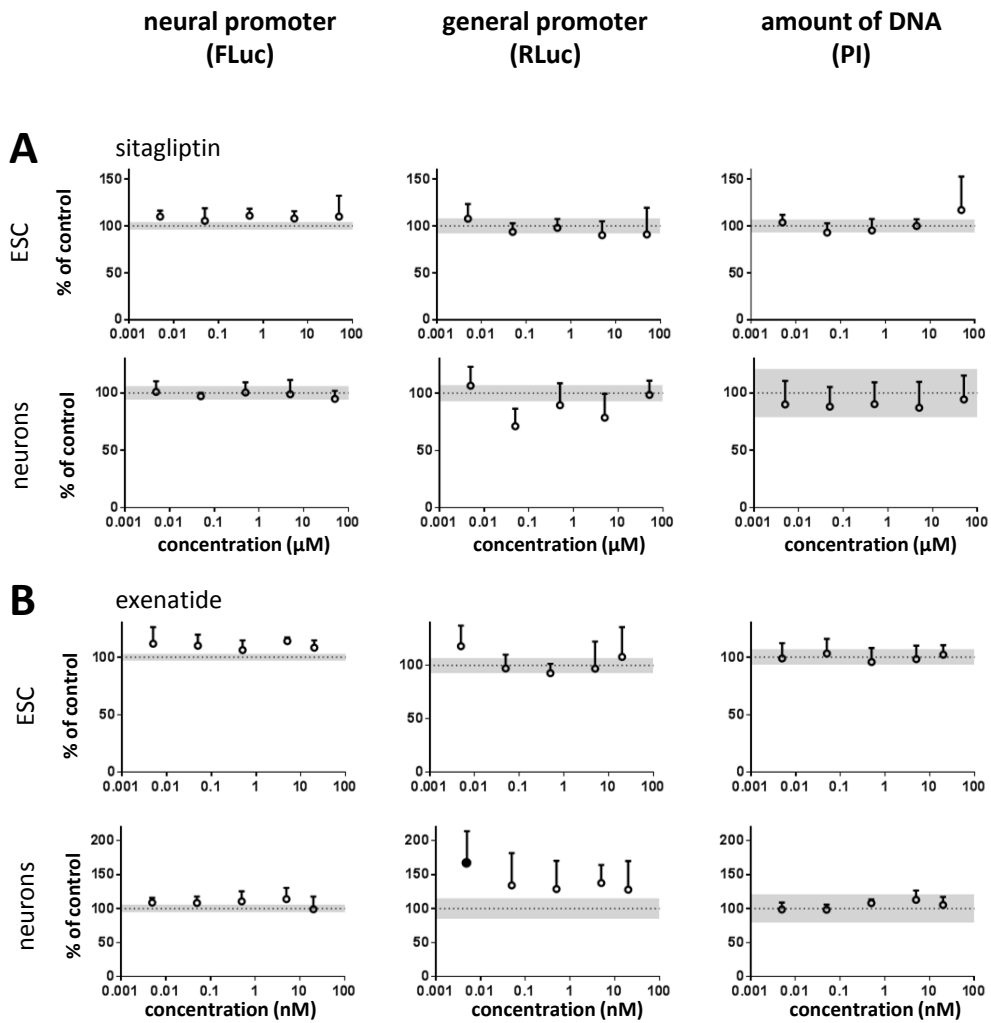

Fig. S12

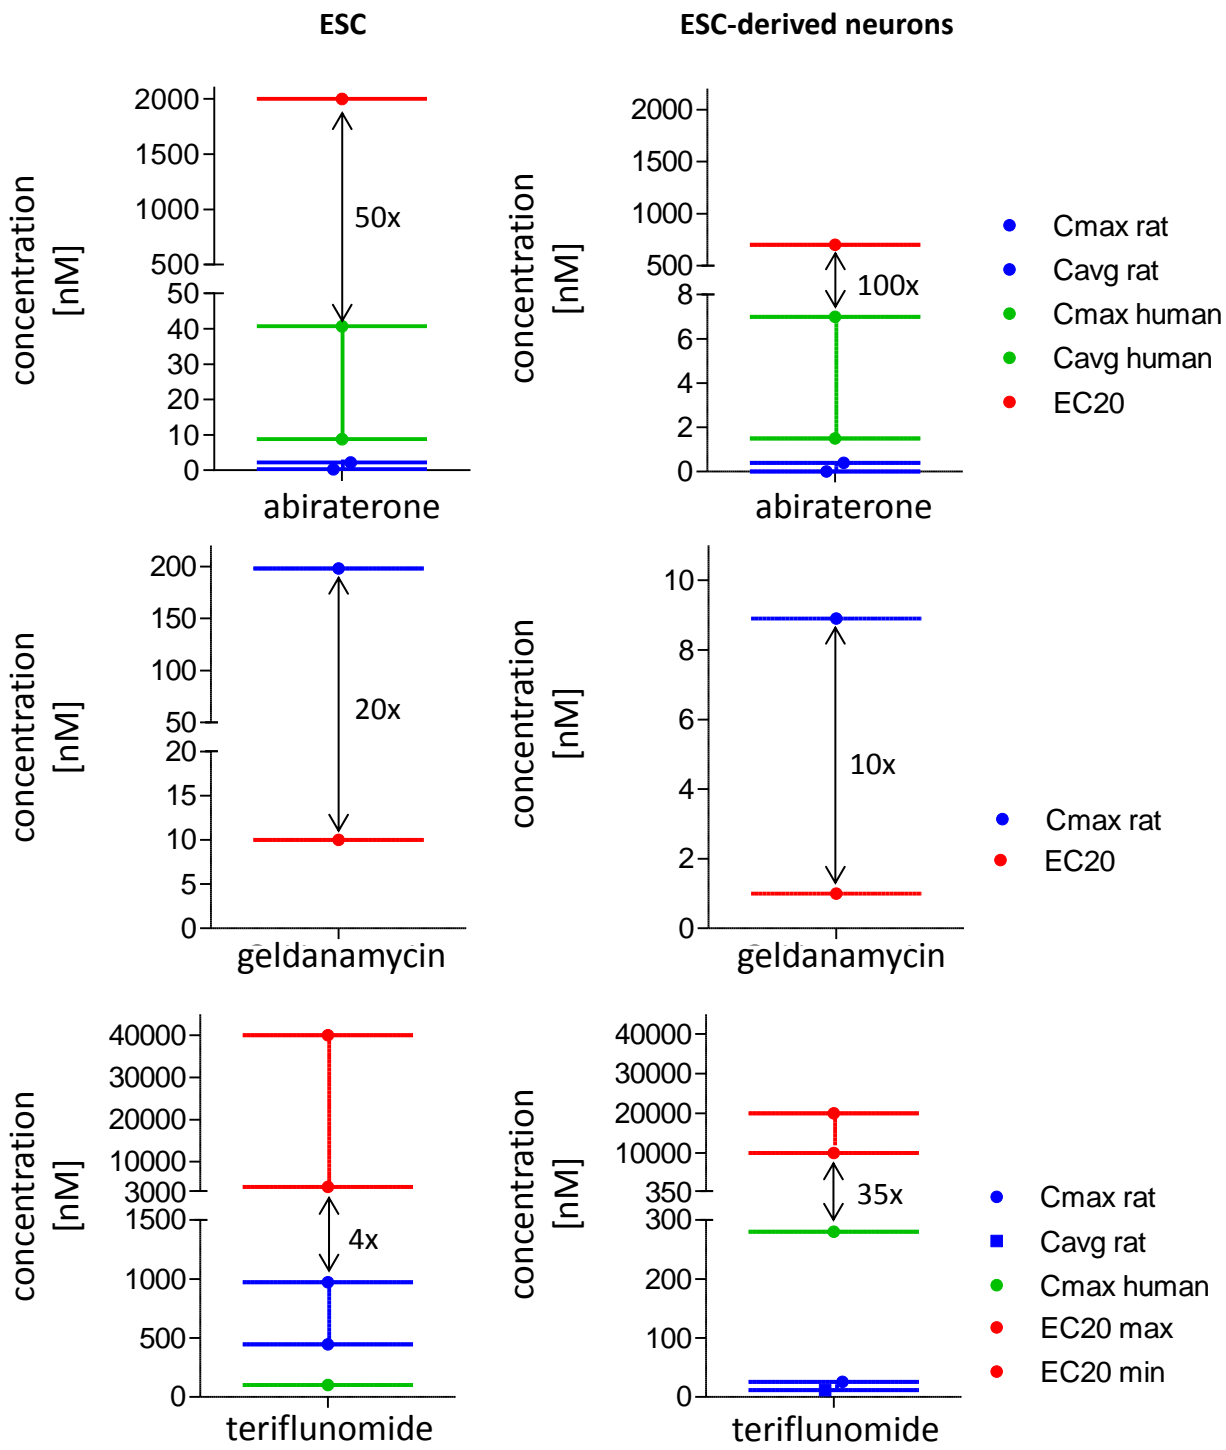

Fig. S13

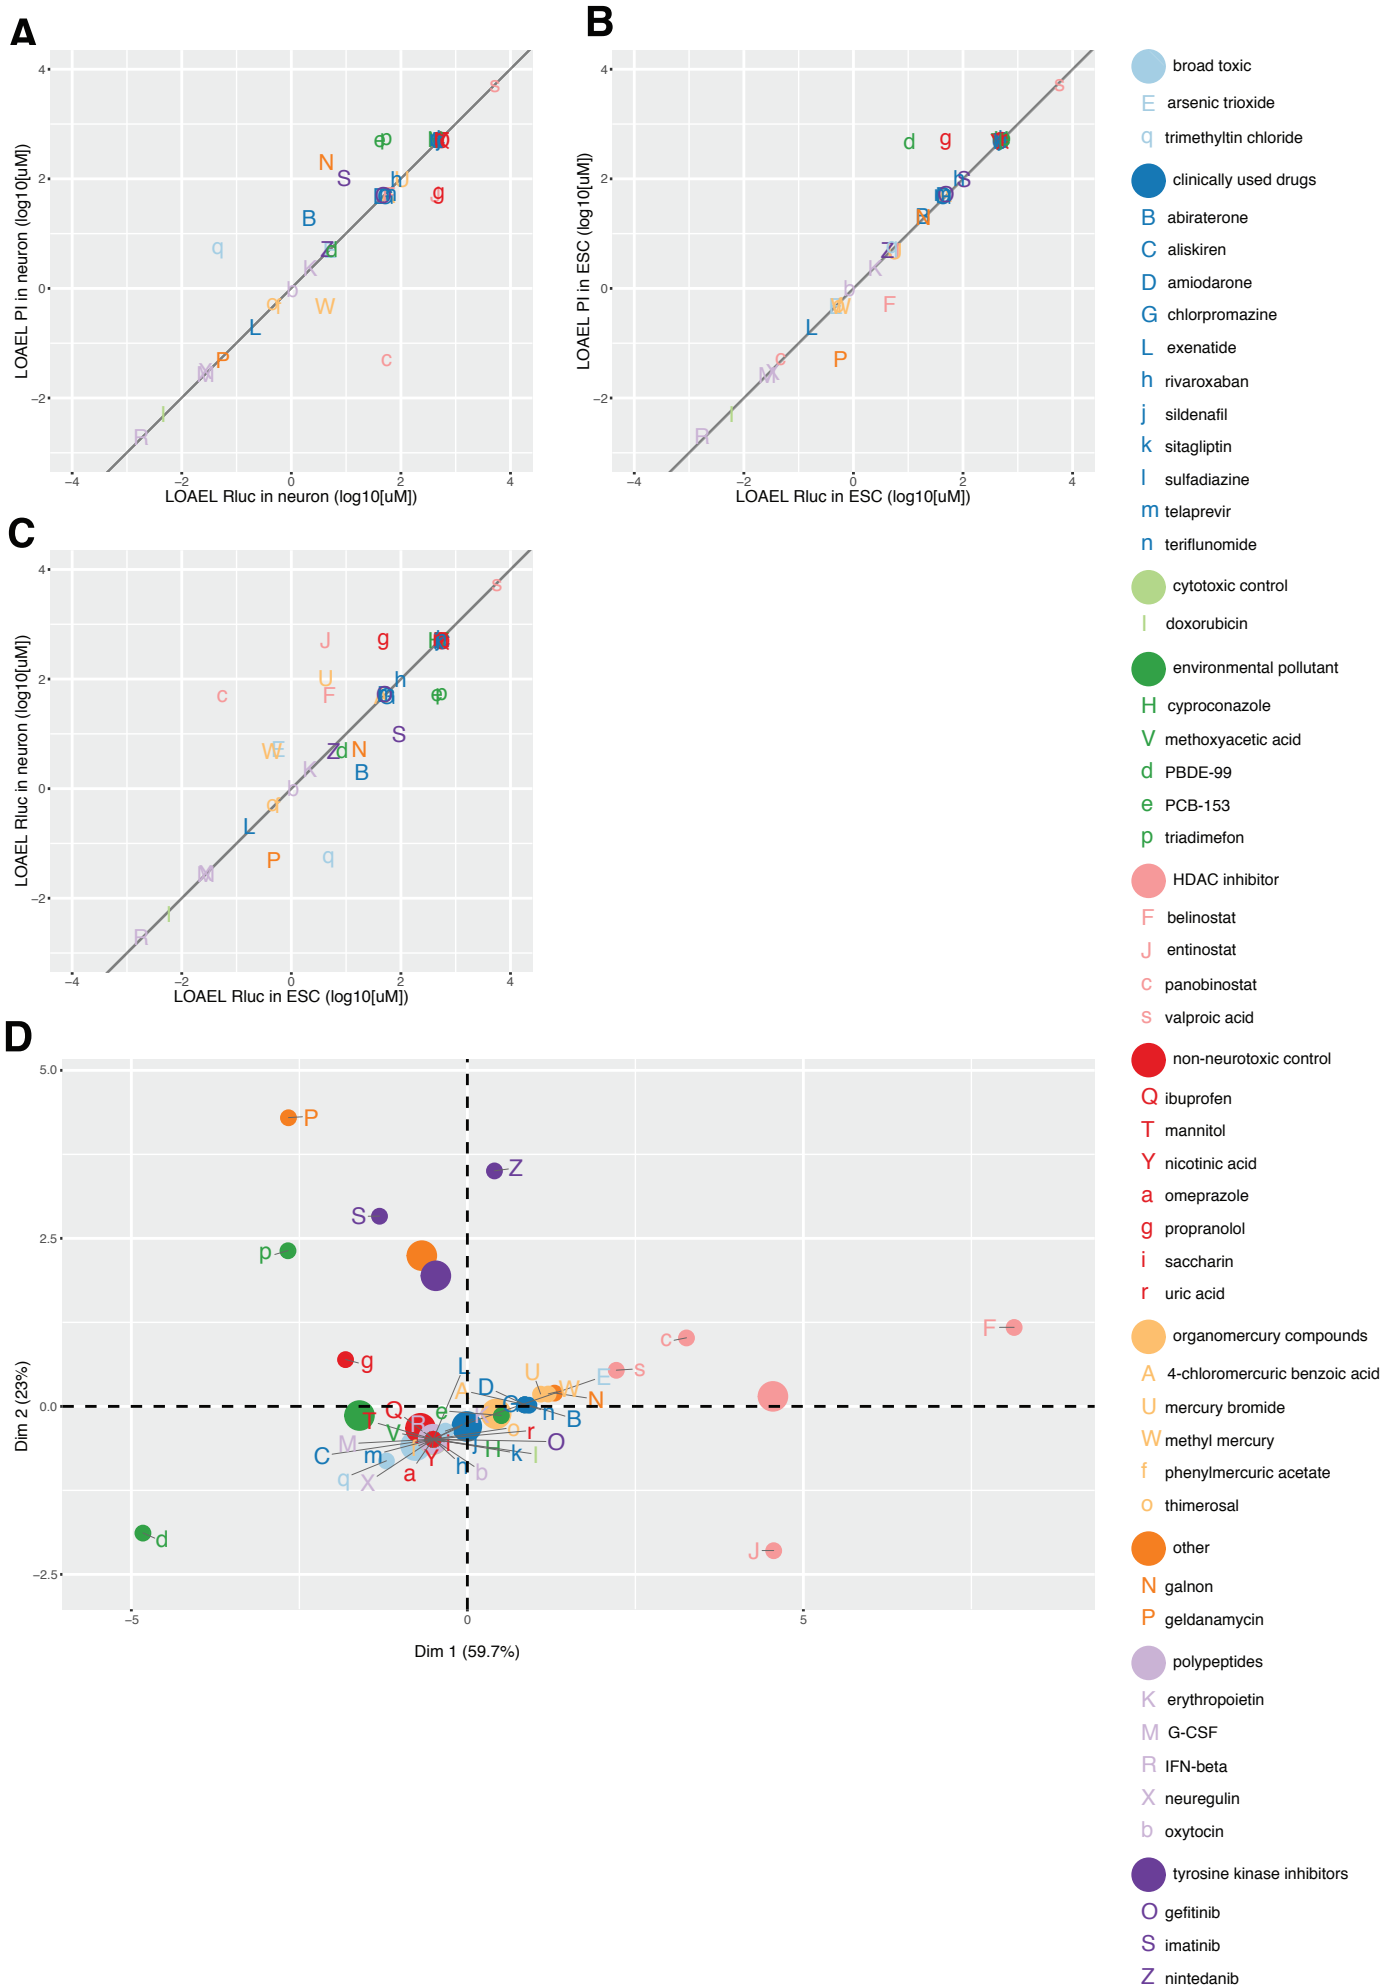

Fig. S14



## Supplemental Figure Legends

**Fig. S1** Type of response curves as a function of compound category. Four types of response curves were observed: no change, down-stroke, bimodal, upstroke. Histograms representing the percentage of each curve type in a compound category are shown. Separate analysis for pluripotent cells (panel A) and neurons (panel B). Significant enrichment of a response type in a compound category was estimated with hypergeometric probability distribution (\* FDR < 0.05; \*\* FDR < 0.01; \*\*\* FDR < 0.001). FDR = false discovery rate (i.e. p-value corrected with Benjamin & Hochberg approach).

**Fig. S2** (A) Values for lipid fraction (VFL), albumin concentration (P) and total protein concentration (P)\* in rat and human plasma and in N2 (x) and BHK (y) medium. The total protein concentration was used for abiraterone IVIV-modelling only. (B-D) Values for plasma bound fraction (fb,pl); octanol:water partition coefficient (Kow) and molecular weight (MW). For each compound, the total concentration found to be toxic (or effective) in *in vivo* studies and the related free concentration are reported for different species (rat and human). Two parameters have been used: maximal concentration (Cmax) and average concentration (Cavg) calculated as the ratio of the area under the curve (AUC) on the dose interval ( $\tau$ ). These data have been used to calculate equivalent total (nominal) *in vitro* concentrations corresponding to *in vivo* toxic/effective concentrations for N2 medium (ECx) and BHK medium (ECy).

**Fig. S3 and S4** Effect of well-known non-toxic compounds. Cells were exposed to compounds for 48h, neural (FLuc) and general (RLuc) promoter activities and DNA quantity (PI assay) were determined. Results are expressed as percent of control + SD. Mean control values (100%) is shown as dotted line; the SD of control values is shown as grey area. Data points that differ in a statistically significant manner from control values were determined by one-way repeated-measures ANOVA followed by Dunnett's post hoc test and are shown as filled circles. **Data were obtained from 4-6 replicates.**

**Fig. S5 - S12** Effect of other compounds of ESNATS collection. Cells were exposed to compounds for 48h, neural (FLuc) and general (RLuc) promoter activities and DNA quantity (PI assay) were determined. Results are expressed as percent of control + SD. Mean control values (100%) are shown as dotted line; the SD of control values is shown as grey area. Data points that differ in a statistically significant manner from control values were determined by one-way repeated-measures ANOVA followed by Dunnett's post hoc test and are shown as filled circles. **Data were obtained from 4-14 replicates.**

**Fig. S13** Graphical representation of the relevant concentrations listed in Fig.1 B (main text). Data in rats (blue), in clinical studies (green) and in our *in vitro* systems (ESC and neurons) are showed for each compound. The arrows indicate the concentration folds between the *in vitro* and the *in vivo* concentration ranges.

**Fig. S14 A-C)** A scatterplot of log<sub>10</sub> transformed LOAEL. **D) A principal component analysis (PCA) of compounds using orthogonal distances from the alert plot diagonals.** For each compound orthogonal distances to the diagonals on alert plots (A-G) in the figure 6 were calculated, yielding 6 values for each compound. These were used as input for principal component analysis (PCA) where each dot represents a compound that was labeled according to its class in Table 2.

## Supplemental Bibliography

- Eskenazi B, Chevrier J, Rauch SA, et al. (2013) In utero and childhood polybrominated diphenyl ether (PBDE) exposures and neurodevelopment in the CHAMACOS study. *Environ Health Perspect* 121(2):257-62 doi:10.1289/ehp.1205597
- Grandjean P, Herz KT (2015) Trace elements as paradigms of developmental neurotoxicants: Lead, methylmercury and arsenic. *J Trace Elem Med Biol* 31:130-134 doi:10.1016/j.jtemb.2014.07.023
- Grandjean P, Landrigan PJ (2006) Developmental neurotoxicity of industrial chemicals. *Lancet* 368(9553):2167-78 doi:10.1016/S0140-6736(06)69665-7
- Jentink J, Loane MA, Dolk H, et al. (2010) Valproic acid monotherapy in pregnancy and major congenital malformations. *N Engl J Med* 362(23):2185-93 doi:10.1056/NEJMoa0907328
- Kreyberg S, Torvik A, Bjorneboe A, Wiik-Larsen W, Jacobsen D (1992) Trimethyltin poisoning: report of a case with postmortem examination. *Clin Neuropathol* 11(5):256-9
- Krug AK, Kolde R, Gaspar JA, et al. (2013) Human embryonic stem cell-derived test systems for developmental neurotoxicity: a transcriptomics approach. *Arch Toxicol* 87(1):123-43 doi:10.1007/s00204-012-0967-3
- Morris E, Green D, Gaudins A (2009) Neuroleptic malignant syndrome developing after acute overdose with olanzapine and chlorpromazine. *J Med Toxicol* 5(1):27-31
- [http://www.ema.europa.eu/docs/en\\_GB/document\\_library/EPAR\\_-\\_Public\\_assessment\\_report/human/001016/WC500036361.pdf](http://www.ema.europa.eu/docs/en_GB/document_library/EPAR_-_Public_assessment_report/human/001016/WC500036361.pdf)
- [http://www.accessdata.fda.gov/drugsatfda\\_docs/label/2015/206995s000lbl.pdf](http://www.accessdata.fda.gov/drugsatfda_docs/label/2015/206995s000lbl.pdf)
- Orr CF, Ahlskog JE (2009) Frequency, characteristics, and risk factors for amiodarone neurotoxicity. *Arch Neurol* 66(7):865-9 doi:10.1001/archneurol.2009.96
- Patejdl R, Markmann S, Benecke R, Wittstock M (2013) Severe acute motor neuropathy after treatment with triple tyrosine kinase inhibitor BIBF 1120 (Nintedanib). *Clin Neurol Neurosurg* 115(9):1851-2 doi:10.1016/j.clineuro.2013.01.011
- Reboli AC, Mandler HD (1992) Encephalopathy and psychoses associated with sulfadiazine in two patients with AIDS and CNS toxoplasmosis. *Clin Infect Dis* 15(3):556-7
- Rinne ML, Lee EQ, Wen PY (2012) Central nervous system complications of cancer therapy. *J Support Oncol* 10(4):133-41 doi:10.1016/j.suonc.2011.11.002
- Zimmer B, Pallocca G, Dreser N, et al. (2014) Profiling of drugs and environmental chemicals for functional impairment of neural crest migration in a novel stem cell-based test battery. *Arch Toxicol* 88(5):1109-26 doi:10.1007/s00204-014-1231-9
